# Supplementary material
Source: PubMed Central journal article supplement (PMC5707159)
Supplement: jci-127-93486-s001.pdf [file jci-127-93486-s001.pdf]

# 1 Supplemental material

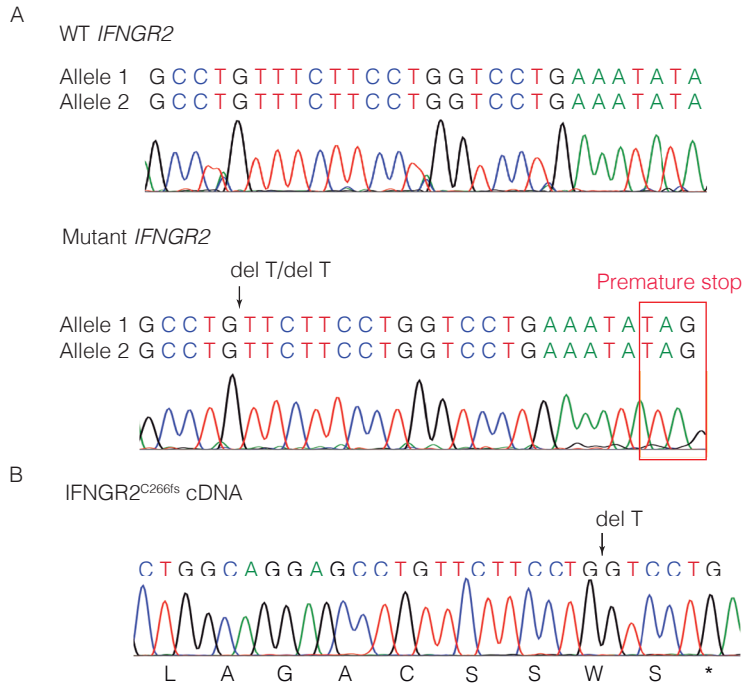

2

3 **Supplementary Figure 1. Sanger sequencing of IFNGR2 using genomic DNA from the**  
4 **patient's blood and cDNA from the patient's fibroblasts. A.** Sanger sequencing of gDNA  
5 demonstrates the homozygous *IFNGR2* mutation (798delT) in the patient, which is absent in the  
6 control. **B.** Sanger sequencing of cDNA from the proband's fibroblasts demonstrates the  
7 premature truncation at residue 270 of the *IFNGR2*<sup>C266fs</sup>.

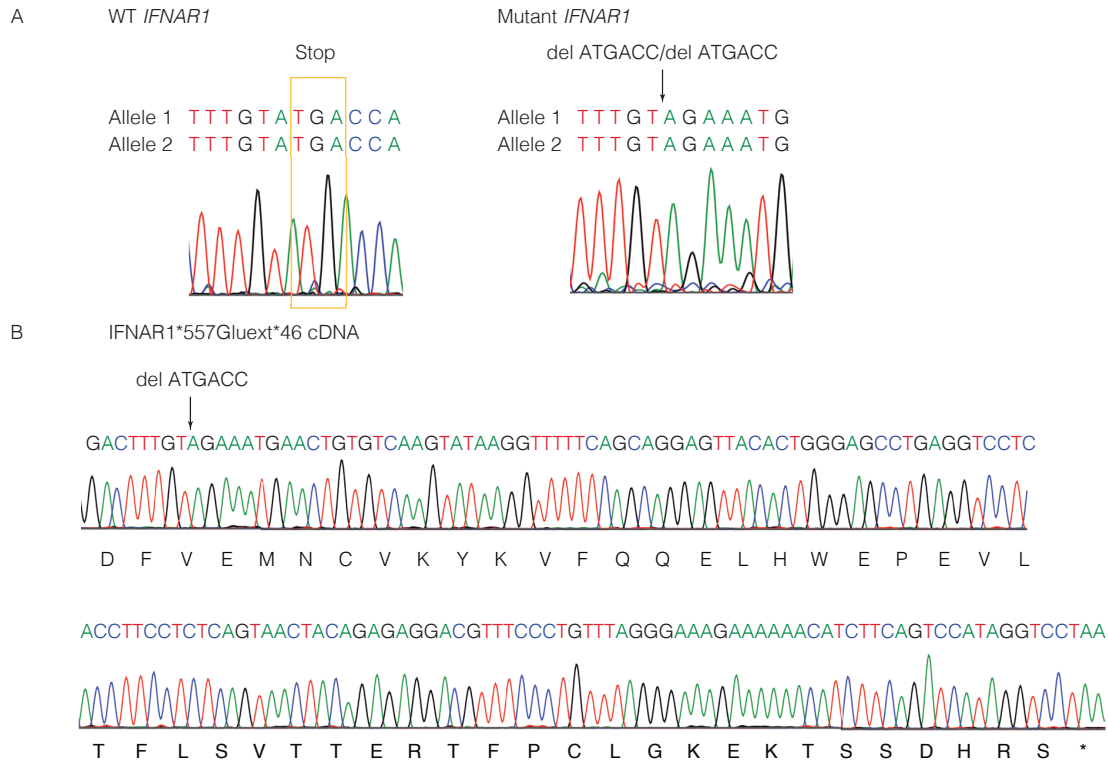

8

9 **Supplementary Figure 2. Sanger sequencing of IFNAR1 using genomic DNA from the**

10 **patient's blood and cDNA from the patient's fibroblasts. A.** Sanger sequencing

11 chromatograms of gDNA demonstrates the homozygous *IFNAR1* mutation (1671\_1821del) in the

12 patient, which is absent in the control. **B.** Sanger sequencing of cDNA from the proband's

13 fibroblasts demonstrates the addition of a novel 46 amino acid sequence to the C-terminus of

14 IFNAR1\*557Gluext\*46. **C.** Immunoblot of HEK293T cells transfected with either wild-type or mutant

15 IFNGR2, and treated with cyclohexamide (CHX) ± MG132, as indicated. The data shown is

16 representative of three independent experiments.

17

18

19 **Supplementary Table 1.** Mutations which are homozygous in the patient and not found in the  
20 dnSNP, 1000 Genomes, or ExAC databases.

| Chromosome | Start     | Reference | Patient | Gene            |
|------------|-----------|-----------|---------|-----------------|
| chr1       | 67242069  | -         | C       | <i>TCTEX1D1</i> |
| chr1       | 85930490  | A         | G       | <i>DDAH1</i>    |
| chr7       | 76144774  | A         | T       | <i>UPK3B</i>    |
| chr11      | 4592708   | -         | AG      | <i>C11orf40</i> |
| chr12      | 974308    | -         | C       | <i>WNK1</i>     |
| chr12      | 4736727   | T         | G       | <i>AKAP3</i>    |
| chr13      | 49796269  | TC        | -       | <i>MLNR</i>     |
| chr21      | 34143903  | T         | G       | <i>GCFC1</i>    |
| chr21      | 34727852  | ATGACC    | -       | <i>IFNAR1</i>   |
| chr21      | 34805097  | T         | -       | <i>IFNGR2</i>   |
| chr22      | 38485609  | C         | T       | <i>BAIAP2L2</i> |
| chrX       | 54785283  | A         | T       | <i>ITIH6</i>    |
| chrX       | 105279192 | AA        | -       | <i>SERPINA7</i> |

21

## 22 **Methods**

### 23 **Genetic analysis**

24 WES was performed on genomic DNA from the patient using the Illumina HiSeq-2000 (Illumina  
25 Inc., San Diego, CA), using Agilent SureSelect for library preparation. The average coverage of  
26 the exome was 150x. The Burrows-Wheeler Aligner (BWA) was used to map reads to the human  
27 reference genome assembly GRCh37<sup>41</sup>. Variants were called using the Genome Analysis Toolkit  
28 (GATK)<sup>42</sup>, Sam Tools<sup>43, 44</sup> and Picard tools (<http://picard.sourceforge.net>). The raw reads have  
29 been deposited in the Sequence Read Archive, under Biosample accession number  
30 PRJNA397405 (SRP114945).

### 31 **Sanger sequencing**

32 Sanger sequencing was used to validate the mutations in the *IFNGR2* and *IFNAR1* genes  
33 identified on the proband by WES and to identify the carrier status of the parents. Two pairs of  
34 gene specific nested primers were used to cover the mutation site in each gene: *IFNGR2* (F1: 5'-  
35 GTGAGAAGAGTGCTGAACTG-3'; F2: 5'-GTGCGTAGGAAGATCATTCT-3'; R1: 5'-  
36 ACCATTAAGATGTCTGCGTG-3'; R2: 5'-AGAGATTGTACCATGACACT-3'), *IFNAR1* (F1: 5'-

37 TAGTATTTCTCTGAACAGCCAT-3'; F2: 5'-TCAACTTCTGAGGAACAAATCG-3'; R1: 5'-  
38 TGACTCATCTCATCCAATGC-3'; R2: 5'-GACCTATGATCTGAAGATGT-3').

### 39 **cDNA sequencing**

40 RNA from skin derived fibroblasts was extracted using the RNeasy Mini Kit (Qiagen) and was  
41 reverse-transcribed with the OneStep RT-PCR kit (Qiagen) as per kit protocol. cDNA was  
42 sequenced with nested IFNGR2<sup>C266fs</sup> (F1: 5'-CTTTGACATCGCTGATACCTC-3'; F2: 5'-  
43 CTCCAGAGTGTACTGTTTACA-3'; R1: 5'-AAGCGTTTGGAGAACATCTTCT-3'; R2: 5'-  
44 GAACATCTTCTTGCTCCTTTT-3') or IFNAR1<sup>\*557next\*46</sup> specific primers (F1: 5'-  
45 TTCTCTGAACAGCCATTGAAGAA-3'; F2: 5'-GCTACAGTAGAAGAACTAAT-3'; R1: 5'-  
46 TTAGGACCTATGATCTGAAGATGT-3'; R2: 5'-TCTGACTCATCTCATCCAATGC-3').

### 47 **Cell-culture and stimulation conditions**

48 Fibroblasts were maintained in DMEM supplemented with 10% fetal bovine serum, 50,000 IU  
49 penicillin, 50,000µg streptomycin, 10µM HEPES, and 2mM Glutamine. PBMCs were isolated  
50 using Ficoll, and were cultured in RPMI medium supplemented with 10% fetal bovine serum,  
51 50,000IU penicillin, 50,000µg streptomycin, 10µM HEPES, and 2mM Glutamine overnight. Cells  
52 were stimulated with IFN-α or IFN-γ (R&D systems) 1000 IU/mL for the described time points.

### 53 **Immunoblotting**

54 Cultured skin fibroblasts were homogenized in PBS that contains 30mM Tris-HCl pH 7.5, 120mM  
55 NaCl, 2mM KCl, 1% Triton X-100 and 2mM EDTA supplemented with protease and phosphatase  
56 inhibitors (Complete and PhoStop, Roche). Proteins were separated by electrophoresis on 4-15%  
57 precast polyacrylamide gels (Bio-Rad) and were transferred to 0.45µm nitrocellulose membrane  
58 (Bio-Rad). Membranes were blocked in a 1x solution Tris-Buffered Saline/Tween 20 (TBST) with  
59 5% (w/v) nonfat dry milk for one hour at room temperature and then incubated overnight at 4°C  
60 with the specified primary antibody. Primary antibodies used as as follows: pSTAT2-Tyr690 (Cell  
61 signaling, 4441), pSTAT1-Tyr701 (Cell signaling, 9167), IFNAR1 (Bethyl, A304-289A), CMV IE1  
62 and IE2 (Millipore, mAb 810R), β-actin (Abcam, ab3280), STAT1 (Cell signaling, 14995), STAT2

63 (Cell signaling, #4594), GAPDH (Abcam, ab8245). Antigen-antibody complexes were visualized  
64 with peroxidase-conjugated secondary antibodies (GE Healthcare) and ECL Western blotting  
65 substrate (Pierce). Densitometry of immunoblots was done using the ImageJ analyzer software  
66 (1.48v).

#### 67 **Subcellular fractionation**

68 To assess pSTAT1 nuclear translocation after 8 or 24h of stimulation with IFN- $\alpha$ , cells were  
69 subjected to subcellular fractionation using a Nuclear Fractionation Kit (Active motif) as per kit  
70 protocol. pSTAT1 nuclear translocation was determined by immunoblotting and quantified as  
71 previously described. As loading controls for each subcellular fraction, membranes were probed  
72 with a polyclonal antibody against Rab5 (Cell signaling, 2143) or PARP (Cell signaling, 9532) for  
73 the cytoplasmic and nuclear fraction, respectively.

#### 74 **Gene expression analysis**

75 After 0, 8, 16 or 24h of stimulation with human IFN- $\alpha$  (1000 IU/mL, R&D Systems), RNA was  
76 extracted from skin-derived fibroblasts using the RNeasy Mini Kit (Qiagen) and was reverse-  
77 transcribed with the iScript cDNA synthesis kit (BioRad). Expression of *IFNGR2*  
78 (Hs00194264\_m1), the ISGs *IFIT1* (Hs00356631\_g1), *IFIT2* (Hs01922738\_s1) and *IRF7*  
79 (Hs01014809\_g1) and the housekeeping gene *GUSB* (Hs00939627\_m1 Life Technologies, USA)  
80 was measured. Results were analyzed using the  $2^{-\Delta\Delta CT}$  method.

#### 81 **Assessment of IFNGR2 turnover**

82 The open reading frame cDNA clone for *IFNGR2* (GeneCopoeia) was cloned into the pcDNA6/V5-  
83 His A expression vector (ThermoFisher) using the InFusion HD Cloning Kit (Takara Bio USA).  
84 The mutant IFNGR2 vector was generated using the following primers for cloning: Forward 5'-  
85 GTGGCGCCGCTCGAGACCATGCGACCGACGCTGC-3' and reverse 5'-  
86 ATAGGCTTACCTTCGAAGGACCAGGAAGAACAGGCTCCTGCCAGCAC-3'). HEK293T cells  
87 maintained in DMEM supplemented with 10% fetal bovine serum, 50,000 IU penicillin, 50,000 $\mu$ g  
88 streptomycin, 10 $\mu$ M HEPES, and 2mM Glutamine were transfected with the wild type or mutant

89 expression vectors using the TransIT-LT1 transfection reagent (Mirus Bio). Two days after  
90 transfection, the cells were incubated for 4, 6, or 8 hours in 100µg/mL cyclohexamide  
91 (Calbiochem) or 100µg/mL cyclohexamide and 5µM MG-132 (Calbiochem). At the end of the  
92 incubations, the cells were harvested and lysed on ice using a solution of 25mM Tris-HCl pH 7.4,  
93 150mM NaCl, 1mM EDTA, 1% Triton X-100, 0.5% sodium deoxycholate, and 1x EDTA-free  
94 Protease Inhibitor Cocktail (Roche). After electrophoresis using 4-15% precast polyacrylamide  
95 gels (Bio-Rad), the blots were analyzed with an anti-IFNGR2 (AF773, R&D Systems) or a β-actin  
96 (Sigma) antibody. Densitometry of immunoblots was done using the ImageJ analyzer software  
97 (1.48v).

#### 98 **Fluorescence-activated cell sorting (FACS) analysis**

99 Standard flow cytometric methods were used for staining of cell-surface proteins. Anti-human  
100 mAbs to the following molecules with the appropriate isotype-matched controls were used for  
101 staining: CD14 (Biolegend, 325606), HLA-DR (Biolegend, 307617) and IFNGR2 (R&D systems,  
102 FAB773). IFNGR2 studies were done on PBMCs. For HLA-DR upregulation and STAT1  
103 phosphorylation studies, fibroblasts were stimulated with IFN-γ (1000 IU/mL) for the specified time  
104 points prior to analysis with flow cytometry. For intracellular staining experiments, cells were  
105 permeabilized and fixed using the BD Phosflow Lyse/Fix Buffer and Phosflow Perm Buffer III (BD  
106 biosciences) and subsequently stained with an anti-human mAb to pSTAT1 (Cell Signaling,  
107 #9174). All flow cytometry data was collected with an LSRFortessa (BD Biosciences, San Jose,  
108 Calif) cell analyzer and analyzed with FlowJo software (Tree Star, Ashland, Ore).

#### 109 **Viral infection**

110 The HCMV laboratory strain AD169 was incubated with patient and control fibroblasts at a  
111 multiplicity of infection (MOI) of 1 for six hours. Where specified, fibroblasts were pre-treated for  
112 17 hours with human IFN-α (1000 IU/mL, R&D Systems).

113 **Statistics.** All data is presented as mean ± S.E.M, and compared using the unpaired Student's *t*  
114 test for single comparisons or two-way ANOVA for multiple comparisons, as specified in the figure

115 legends. Statistical analysis was performed using GraphPad Prism software (version 6.0). For  
116 quantification of the % pSTAT1 in the nuclear and cytoplasmic fraction of control and patient  
117 fibroblsts, the nuclear and cytoplasmic fractions were first normalized to either PARP or Rab5,  
118 respectively, and summed to obtain total pSTAT1. The ratio of pSTAT1 for each fraction relative  
119 to the total pSTAT1 content is shown.

120
